# Supplementary material for: Victory above all: the weight loss practices and perceptions of Chinese male kickboxers.
Source: PeerJ journal article supplement (doi:10.7717/peerj.19709), 2025-01-01
Supplement: STROBE.pdf [file STROBE.pdf]

STROBE Statement—checklist of items that should be included in reports of observational studies

|                              | Item No. | Recommendation                                                                                                                                                                                                                                                                                                                                                                                                                                                         | Page No.       | Relevant text from manuscript                                                      |
|------------------------------|----------|------------------------------------------------------------------------------------------------------------------------------------------------------------------------------------------------------------------------------------------------------------------------------------------------------------------------------------------------------------------------------------------------------------------------------------------------------------------------|----------------|------------------------------------------------------------------------------------|
| Title and abstract           | 1        | (a) Indicate the study's design with a commonly used term in the title or the abstract                                                                                                                                                                                                                                                                                                                                                                                 | 1              | Victory above all: the weight loss practices and perceptions of Chinese kickboxers |
|                              |          | (b) Provide in the abstract an informative and balanced summary of what was done and what was found                                                                                                                                                                                                                                                                                                                                                                    | 2              | Line 19-49                                                                         |
| <b>Introduction</b>          |          |                                                                                                                                                                                                                                                                                                                                                                                                                                                                        |                |                                                                                    |
| Background/rationale         | 2        | Explain the scientific background and rationale for the investigation being reported                                                                                                                                                                                                                                                                                                                                                                                   | 4-6            | Line 52-118                                                                        |
| Objectives                   | 3        | State specific objectives, including any prespecified hypotheses                                                                                                                                                                                                                                                                                                                                                                                                       | 7              | Line 118-121                                                                       |
| <b>Methods</b>               |          |                                                                                                                                                                                                                                                                                                                                                                                                                                                                        |                |                                                                                    |
| Study design                 | 4        | Present key elements of study design early in the paper                                                                                                                                                                                                                                                                                                                                                                                                                | 7              | Line 125-130                                                                       |
| Setting                      | 5        | Describe the setting, locations, and relevant dates, including periods of recruitment, exposure, follow-up, and data collection                                                                                                                                                                                                                                                                                                                                        | 8-9            | Line 133-152 and Line 176                                                          |
| Participants                 | 6        | (a) <i>Cohort study</i> —Give the eligibility criteria, and the sources and methods of selection of participants. Describe methods of follow-up<br><i>Case-control study</i> —Give the eligibility criteria, and the sources and methods of case ascertainment and control selection. Give the rationale for the choice of cases and controls<br><i>Cross-sectional study</i> —Give the eligibility criteria, and the sources and methods of selection of participants | 8              | Line 144-147                                                                       |
|                              |          | (b) <i>Cohort study</i> —For matched studies, give matching criteria and number of exposed and unexposed<br><i>Case-control study</i> —For matched studies, give matching criteria and the number of controls per case                                                                                                                                                                                                                                                 |                |                                                                                    |
| Variables                    | 7        | Clearly define all outcomes, exposures, predictors, potential confounders, and effect modifiers. Give diagnostic criteria, if applicable                                                                                                                                                                                                                                                                                                                               | Not applicable | Not applicable                                                                     |
| Data sources/<br>measurement | 8*       | For each variable of interest, give sources of data and details of methods of assessment (measurement). Describe comparability of assessment methods if there is more than one group                                                                                                                                                                                                                                                                                   | 8-9            | Line 157-176                                                                       |

|                        |                                       |                                                                                                                                                                                                              |                |                      |
|------------------------|---------------------------------------|--------------------------------------------------------------------------------------------------------------------------------------------------------------------------------------------------------------|----------------|----------------------|
| Bias                   | 9                                     | Describe any efforts to address potential sources of bias                                                                                                                                                    | 9              | Line 170-176         |
| Study size             | 10                                    | Explain how the study size was arrived at                                                                                                                                                                    | 7              | Line 125-127         |
| Quantitative variables | 11                                    | Explain how quantitative variables were handled in the analyses. If applicable, describe which groupings were chosen and why                                                                                 | 10             | Line 183-188         |
| Statistical methods    | 12                                    | (a) Describe all statistical methods, including those used to control for confounding                                                                                                                        | 9-11           | Line 179-211         |
|                        |                                       | (b) Describe any methods used to examine subgroups and interactions                                                                                                                                          | 9-11           | Line 179-211         |
|                        |                                       | (c) Explain how missing data were addressed                                                                                                                                                                  | Not applicable | Not applicable       |
|                        |                                       | (d) <i>Cohort study</i> —If applicable, explain how loss to follow-up was addressed                                                                                                                          | Not applicable | Not applicable       |
|                        |                                       | <i>Case-control study</i> —If applicable, explain how matching of cases and controls was addressed                                                                                                           |                |                      |
|                        |                                       | <i>Cross-sectional study</i> —If applicable, describe analytical methods taking account of sampling strategy                                                                                                 |                |                      |
|                        | (e) Describe any sensitivity analyses | Not applicable                                                                                                                                                                                               | Not applicable |                      |
| <b>Results</b>         |                                       |                                                                                                                                                                                                              |                |                      |
| Participants           | 13*                                   | (a) Report numbers of individuals at each stage of study—eg numbers potentially eligible, examined for eligibility, confirmed eligible, included in the study, completing follow-up, and analysed            | 11             | Line 214 and 220-222 |
|                        |                                       | (b) Give reasons for non-participation at each stage                                                                                                                                                         | 11             | Line 223             |
|                        |                                       | (c) Consider use of a flow diagram                                                                                                                                                                           | Not applicable | Not applicable       |
| Descriptive data       | 14*                                   | (a) Give characteristics of study participants (eg demographic, clinical, social) and information on exposures and potential confounders                                                                     | 11             | Line 214-215         |
|                        |                                       | (b) Indicate number of participants with missing data for each variable of interest                                                                                                                          | Not applicable | Not applicable       |
|                        |                                       | (c) <i>Cohort study</i> —Summarise follow-up time (eg, average and total amount)                                                                                                                             | Not applicable | Not applicable       |
| Outcome data           | 15*                                   | <i>Cohort study</i> —Report numbers of outcome events or summary measures over time                                                                                                                          | Not applicable | Not applicable       |
|                        |                                       | <i>Case-control study</i> —Report numbers in each exposure category, or summary measures of exposure                                                                                                         | Not applicable | Not applicable       |
|                        |                                       | <i>Cross-sectional study</i> —Report numbers of outcome events or summary measures                                                                                                                           | 11-13          | Line 215-257         |
| Main results           | 16                                    | (a) Give unadjusted estimates and, if applicable, confounder-adjusted estimates and their precision (eg, 95% confidence interval). Make clear which confounders were adjusted for and why they were included | Not applicable | Not applicable       |
|                        |                                       | (b) Report category boundaries when continuous variables were categorized                                                                                                                                    | Not applicable | Not applicable       |
|                        |                                       | (c) If relevant, consider translating estimates of relative risk into absolute risk for a meaningful time period                                                                                             | Not applicable | Not applicable       |

|                          |    |                                                                                                                                                                            |                               |              |
|--------------------------|----|----------------------------------------------------------------------------------------------------------------------------------------------------------------------------|-------------------------------|--------------|
| Other analyses           | 17 | Report other analyses done—eg analyses of subgroups and interactions, and sensitivity analyses                                                                             | 11-13                         | Line 215-257 |
| <b>Discussion</b>        |    |                                                                                                                                                                            |                               |              |
| Key results              | 18 | Summarise key results with reference to study objectives                                                                                                                   | 13                            | Line 262-273 |
| Limitations              | 19 | Discuss limitations of the study, taking into account sources of potential bias or imprecision.<br>Discuss both direction and magnitude of any potential bias              | 20                            | Line 419-423 |
| Interpretation           | 20 | Give a cautious overall interpretation of results considering objectives, limitations, multiplicity of analyses, results from similar studies, and other relevant evidence | 14-20                         | Line 275-417 |
| Generalisability         | 21 | Discuss the generalisability (external validity) of the study results                                                                                                      | 20-21                         | Line 419-435 |
| <b>Other information</b> |    |                                                                                                                                                                            |                               |              |
| Funding                  | 22 | Give the source of funding and the role of the funders for the present study and, if applicable, for the original study on which the present article is based              | Reported in submission system |              |

\*Give information separately for cases and controls in case-control studies and, if applicable, for exposed and unexposed groups in cohort and cross-sectional studies.

**Note:** An Explanation and Elaboration article discusses each checklist item and gives methodological background and published examples of transparent reporting. The STROBE checklist is best used in conjunction with this article (freely available on the Web sites of PLoS Medicine at <http://www.plosmedicine.org/>, Annals of Internal Medicine at <http://www.annals.org/>, and Epidemiology at <http://www.epidem.com/>). Information on the STROBE Initiative is available at [www.strobe-statement.org](http://www.strobe-statement.org).
