# Supplementary material for: Victory above all: the weight loss practices and perceptions of Chinese male kickboxers
Source: PeerJ. 2025 Jul 9;13:e19709. doi: 10.7717/peerj.19709 (PMC12255242; doi:10.7717/peerj.19709)
Supplement: Supplemental Information 2 [file peerj-13-19709-s002.xlsx]

## Sheet: Sheet1
ID	1. I have read the informed consent form above, and by completing this online survey, I agree to participate in this study.	2. Age	3. Gender	4. Your sport	5. At what age did you begin to practice your current sport?	6. At what age did you begin to compete your current sport?	7. How much do your current weight? ____kg	8. How much did you weigh in the last off-season?	9. How tall are you?	10. Please describe your achievements and participation in Boxing competitions to date. School, Regional or city level competition	State level	National level	International level	11. How many times did you compete in the last year (including non-official competitions)?	12. In how many competitions did you win medal in the last year (including non-official competitions)?	13. In which weight class do you compete?	14. Did you change your weight class in the last two years?	15. Have you ever lost weight in order to compete?	16. At what age did you begin to cut weight for competitions?	17. What is the MOST WEIGHT that you have cut to compete in your career?	18. How much weight do you usually cut before competitions?	19. How many times did you cut weight to compete last season?	20. In how many days do you usually cut weight before competitions?	21. Please divide the weight loss process into three stages: early before the competition, closer to the competition, and the day before the competition. Consider the total amount of weight you lost as 100%. How much of the total weight loss (100%) do you usually lose in each of these three stages? During the early phase of weight loss (from 60 days to 9 days before the competition), the percenta…	During the late phase (from 8 days to 2 day before the competition), the percentage of total weight lost is ________%.	During the final day phase (from 1 day before the competition to the day of competition), the percentage of total weight lost is ________%.	22. In most cases, who guides your weight loss process? (Multiple choice question) Yourself	Sport coach	Strength and conditioning coach	Medical staff	Nutritionist	Parents	Other	23. Usually, after weighing in, how much weight do you typically recover before the competition and then compete?	24. Using the scale below, please rate the amount of influence that each individual listed below has had on your weigth loss practices.Other athlete (different sport)	Other athlete (same sport) /training colleague	Physician/doctor	Strength and conditioning coach /physical trainer	Sports coach	Parents	Dietitian/ nutritionist	Journal articles	Book/ magazines	Internet sources	Other. Explain________________	25. The table below presents several methods to lose weight rapidly. Using the table below, Gradual dieting	Skipping meals	Fasting	Restricting fluid ingestion
20	1	14	1	6	11	11	75	74	183	1	3	3	3	3	2	75	2	1	13	2	2	2	5	30	40	30	0	1	0	0	0	0	0	1	4	4	4	2	2	5	2	2	2	2	2	2	3	3	4
27	1	15	1	6	13	14	57	57	173	2	3	3	3	2	1	57	1	1	15	4	2	2	5	40	40	20	1	0	0	0	0	0	0	2	3	3	3	3	3	3	3	3	3	3	3	5	5	5	5
35	1	17	1	6	14	15	70	70	172	1	3	3	3	1	1	70	2	1	16	4	4	0	4	30	60	10	0	1	0	0	0	0	0	10	1	1	1	1	1	1	1	1	1	1	1	1	2	3	2
36	1	21	1	6	15	17	78	79	175	1	1	1	2	1	0	71	2	1	18	7	7	1	7	60	20	20	1	1	0	0	0	0	0	2	1	1	1	1	3	3	3	3	3	4	3	3	3	3	2
48	1	15	1	6	12	13	48	49	163	1	3	3	3	1	2	47	1	1	14	5	3	2	6	60	30	10	0	1	0	0	0	0	0	1	1	5	3	5	5	5	5	2	4	4	3	3	2	4	4
50	1	13	1	6	11	11	42	42	163	1	3	3	3	1	2	38	1	1	11	6	5	1	6	40	30	30	1	0	0	0	0	0	0	6	1	1	1	1	5	1	1	1	1	1	1	2	2	5	1
54	1	17	1	6	11	12	57	58	170	1	3	3	3	1	2	57	2	1	17	2	2	1	6	40	30	30	0	1	0	0	0	0	0	2	1	1	1	1	1	1	1	1	1	1	1	3	3	3	3
59	1	16	1	6	13	13	54	54	167	1	3	3	3	2	2	54	1	1	14	4	3	4	7	45	35	20	0	1	0	0	0	0	0	3	3	3	3	3	3	3	3	5	3	3	3	2	2	2	1
66	1	15	1	6	12	12	54	55	169	1	3	3	3	1	1	54	1	1	14	9	5	1	5	10	75	15	1	0	0	0	0	0	0	2	1	4	1	1	4	4	1	1	1	4	4	1	1	2	2
73	1	17	1	6	16	16	73	72	175	1	3	3	3	1	0	71	2	1	16	5	2	1	6	60	33	7	1	0	0	0	0	0	0	1	1	2	2	4	4	3	2	3	4	4	1	4	3	4	4
90	1	16	1	6	13	14	60	57	178	1	3	3	3	2	1	57	2	1	15	3	2	2	4	40	35	25	0	1	0	0	0	0	0	2	4	5	3	4	4	3	5	2	2	2	2	3	3	4	3
92	1	14	1	6	12	11	48	50	170	1	3	3	3	1	2	48	2	1	13	3	3	5	5	50	40	10	0	1	0	0	0	0	0	1	2	2	2	2	2	1	1	2	1	1	1	4	4	4	4
94	1	17	1	6	13	15	72	71	178	1	3	3	3	1	0	71	2	1	14	4	4	2	4	5	80	15	1	1	0	0	0	0	0	5	1	2	2	2	4	1	1	1	1	1	1	2	2	4	4
119	1	13	1	6	11	11	47	35	160	1	3	3	3	2	3	45	1	1	12	3	2	3	2	10	30	60	0	1	0	0	0	0	0	2	1	1	1	1	1	1	1	1	1	4	1	1	2	4	1
129	1	17	1	6	16	16	62	62	175	1	3	3	3	1	1	57	1	1	16	4	4	1	4	70	28	2	1	1	0	0	0	0	0	3	1	4	1	1	3	1	1	1	1	4	1	2	1	4	1
135	1	15	1	6	10	12	52	53	169	2	3	3	3	1	0	52	1	1	12	2	2	0	7	15	35	50	0	1	0	0	0	0	0	0	1	4	4	4	5	5	4	4	4	4	4	4	4	4	3
136	1	15	1	6	10	13	62	62	170	1	3	3	3	1	0	57	1	1	12	3	1	2	6	45	35	20	0	1	0	0	0	0	0	0.3	4	5	2	3	4	5	1	1	1	1	1	1	5	5	2
145	1	17	1	6	15	17	65	62	173	1	3	3	3	1	0	62	2	1	16	6	2	1	6	60	30	10	1	0	0	0	0	0	0	1	1	2	2	4	4	3	4	2	2	4	1	4	3	4	4
146	1	18	1	6	16	17	71	69	181	1	3	3	3	1	1	71	1	1	17	4	2	1	4	25	40	35	0	1	1	0	0	0	0	4	1	2	1	1	1	1	1	2	2	1	2	3	3	4	4
162	1	15	1	6	12	14	58	56	173	1	3	3	3	1	1	57	2	1	14	7	2	1	4	70	25	5	0	1	0	0	0	0	0	2	3	4	5	3	3	3	3	3	3	3	3	3	3	3	4
180	1	16	1	6	12	13	65.4	65.4	177	1	3	3	3	2	2	63.5	2	1	13	2.4	1.5	1	6	45	40	15	1	1	0	0	0	0	0	1	4	5	2	3	4	5	1	1	1	1	1	1	5	5	2
185	1	18	1	6	14	17	71	69	177	1	3	3	3	1	1	66	2	1	17	10	8	1	6	45	35	20	1	1	0	0	0	0	0	0.5	1	1	1	1	1	1	1	1	1	1	1	4	4	4	4
194	1	15	1	6	14	15	57	57	173	2	3	3	3	2	1	54	1	1	13	5	3	2	6	60	30	10	1	1	1	0	0	0	0	6	1	2	4	4	3	3	3	4	4	4	4	5	5	4	5
208	1	14	1	6	11	13	45	42	162	1	3	3	3	2	2	42	1	1	13	5	3	1	5	10	60	30	0	1	0	0	0	0	0	2	2	5	2	2	4	5	3	3	3	3	3	3	5	4	3
212	1	16	1	6	14	15	65	64	181	1	3	3	3	8	8	63.5	2	1	15	2	2	2	4	50	40	10	0	1	0	0	0	0	0	1	1	1	3	3	3	3	3	3	3	3	3	4	4	4	4
215	1	19	1	6	15	18	67	67	180	1	3	1	3	1	1	63	2	1	17	7	5	1	6	50	30	20	0	1	0	0	0	0	0	2	3	3	3	3	3	3	3	3	3	5	1	4	2	4	4
235	1	13	1	6	10	13	76	76	156	1	3	3	3	1	2	71	2	1	11	3.1	2	1	7	30	40	30	1	0	0	0	0	0	0	2	2	2	1	3	4	2	1	1	1	1	1	2	2	3	2
245	1	19	1	6	12	19	72	72	180	1	3	3	3	1	1	67	2	1	16	12	6	2	7	30	50	20	1	0	0	0	0	0	0	1	3	2	2	2	2	2	2	2	2	2	2	4	4	4	4
249	1	18	1	6	16	17	67	63	170	1	3	3	3	1	1	60	2	1	17	6	3	2	5	60	30	10	1	1	0	0	0	0	0	1	2	4	3	4	4	2	4	2	2	3	4	3	2	4	2
253	1	16	1	6	14	14	63.5	63.6	173	1	3	3	3	1	1	63.5	2	1	14	3.5	3.5	1	6	50	25	25	1	1	0	0	0	0	0	0.5	2	4	3	4	5	4	3	3	3	3	3	1	5	5	5
254	1	16	1	6	12	14	58	58	180	1	3	3	3	2	2	60	2	1	14	3	1.5	2	2	35	45	20	0	1	0	0	0	0	0	1	4	5	3	4	4	3	5	3	3	3	3	3	2	4	4
255	1	16	1	6	10	10	90	84	173	1	3	3	3	1	1	85	2	1	14	10	6	0	6	40	40	20	0	1	0	0	0	0	0	1	1	4	2	4	5	1	1	1	4	4	1	1	5	4	3
262	1	16	1	6	13	13	52	52	170	1	3	3	3	2	2	52	1	1	14	3	3	4	6	35	45	20	0	1	0	0	0	0	0	2	3	3	3	3	5	5	3	3	3	3	3	4	4	4	4
276	1	16	1	6	14	14	71	74	179	1	3	3	3	1	1	71	2	1	15	8	8	1	6	35	35	30	0	1	0	0	0	0	0	1	1	5	1	1	4	5	1	1	1	4	1	1	1	3	2
280	1	17	1	6	16	16	74	72	183	1	3	3	3	1	1	71	2	1	16	3	3	1	5	60	30	10	0	1	0	0	0	0	0	2	1	1	1	1	1	1	1	1	1	1	1	2	4	4	4
285	1	16	1	6	11	14	69	67	175	1	3	3	3	1	2	67	2	1	14	3	2	1	6	30	40	30	0	1	0	0	0	0	0	2	2	2	3	4	4	4	3	1	1	1	1	2	2	3	2
290	1	17	1	6	14	16	78	78	176	1	3	3	3	1	1	75	1	1	17	8	7	1	6	80	20	0	1	0	0	0	0	0	0	3	3	4	1	1	5	5	1	1	1	1	1	4	4	4	4
297	1	15	1	6	12	14	59	59	169	1	3	1	3	2	2	57	1	1	14	6	2	3	6	80	10	10	0	1	0	0	0	0	0	2	1	4	4	1	5	4	1	1	3	1	1	3	3	4	4
305	1	17	1	6	15	15	75	75	183	1	3	3	3	1	1	75	2	1	17	16	5	1	6	60	30	10	1	1	0	0	0	0	0	1	3	2	2	4	4	2	2	2	2	1	1	5	5	4	4
315	1	12	1	6	12	12	48	47	170	1	3	3	3	1	0	48	2	1	12	5	4	1	4	30	40	30	1	0	0	0	0	0	0	2	4	4	5	5	5	1	1	1	5	1	1	2	4	4	3
317	1	14	1	6	12	12	56	54	175	1	3	3	3	1	0	54	1	1	13	3	3	1	5	50	30	20	1	0	0	0	0	0	0	1	4	4	1	1	5	5	1	1	1	4	3	1	4	4	4
319	1	16	1	6	15	15	69	67	178	1	3	3	3	1	2	67	1	1	15	3	3	6	6	91	4	5	1	0	0	0	0	0	0	3	2	1	4	4	4	4	1	1	1	1	1	2	2	2	2
327	1	13	1	6	10	13	40	39	150	1	3	3	3	1	1	38	2	1	11	3	2	1	6	30	40	30	0	1	0	0	0	0	0	1	1	2	1	3	1	1	1	1	1	1	1	4	4	4	4
331	1	14	1	6	12	14	51	52	163	1	3	3	3	1	3	51.5	2	1	14	2	3	3	4	30	40	30	1	1	0	0	0	0	0	1	1	1	1	1	1	1	1	1	1	2	1	4	2	4	4
340	1	18	1	6	14	17	63	60	173	1	3	3	3	1	0	65	2	1	16	5	4	1	6	60	29	11	0	1	0	0	0	0	0	3	2	2	2	3	5	5	2	2	2	4	5	4	4	4	1
346	1	16	1	6	15	15	80	80	185	1	3	3	3	3	1	80	2	1	15	6	2	3	6	25	30	45	1	1	0	0	0	0	0	3	4	4	3	4	5	4	1	1	1	2	1	4	4	4	5
356	1	22	1	6	16	19	70	70	172	1	3	1	2	1	0	60	2	1	18	8	8	1	6	50	30	20	0	1	0	0	0	0	0	3	1	2	1	2	1	1	1	1	1	1	1	2	2	3	2
360	1	17	1	6	14	15	75	77	190	1	3	3	3	1	0	75	2	1	17	6	3	2	5	30	60	10	0	1	0	0	0	0	0	2	1	4	1	1	5	4	1	1	2	2	1	4	4	4	3
362	1	14	1	6	12	13	55	52	168	1	3	3	3	1	2	51	2	1	14	4	2	1	6	45	35	20	1	0	0	0	0	0	0	0.3	1	2	1	1	3	2	1	1	1	1	1	4	2	4	3
377	1	18	1	6	13	15	76	76	186	1	3	1	3	1	0	74	2	1	15	4	4	1	5	46	18	36	0	1	0	0	0	1	0	2	2	2	2	1	1	1	1	2	2	2	2	3	3	3	2
379	1	16	1	6	13	15	65	64	173	1	3	3	3	1	2	57	2	1	15	4	3	1	3	70	20	10	0	1	0	0	0	0	0	3	1	3	1	4	4	1	1	1	1	1	1	4	4	4	4
380	1	17	1	6	16	16	90	90	193	2	3	3	3	3	1	85	2	1	16	8	10	1	6	60	30	10	1	1	0	0	0	0	0	5	3	3	4	3	4	3	1	1	1	1	1	1	3	4	4
381	1	17	1	6	12	16	63	65	170	1	3	3	3	1	0	63	2	1	16	6	3	2	2	22	2	76	1	1	0	0	0	0	0	3	2	2	2	3	5	5	2	2	2	4	1	4	4	4	1
382	1	15	1	6	12	13	67	68	174	2	3	3	3	1	2	63.5	1	1	14	3	3	1	7	87	10	3	1	0	0	0	0	0	0	0.5	1	4	2	2	2	1	1	1	1	1	1	2	2	3	3
383	1	17	1	6	14	16	67	66	175	1	3	3	3	3	1	63.5	2	1	16	7	5	2	3	20	55	25	0	1	0	0	0	0	0	2	1	4	1	4	5	2	3	1	1	1	1	1	2	4	3
388	1	14	1	6	13	13	61	58	176	1	3	3	3	1	0	57	1	1	14	3	2	2	4	65	20	15	1	1	0	0	0	0	0	0.5	1	1	1	1	4	1	1	1	1	1	1	1	1	1	2
389	1	19	1	6	12	18	70	70	178	1	3	2	3	1	0	63	2	1	17	12	7	0	7	50	30	20	0	1	0	0	0	0	0	2	3	3	3	3	3	3	3	3	3	4	3	4	1	4	1
392	1	17	1	6	12	13	68	65	172	1	3	3	3	1	0	67	2	1	13	9	8	3	7	70	25	5	1	1	0	0	0	0	0	2	1	1	1	1	1	1	1	1	1	1	1	2	2	4	2
394	1	18	1	6	12	15	80	83	175	1	3	3	3	1	0	80	2	1	15	4	2	2	6	30	60	10	0	1	0	0	0	0	0	5	1	4	1	1	5	4	1	1	2	2	1	4	4	4	3
406	1	18	1	6	14	14	61	57	180	1	3	1	3	4	4	54	1	1	14	5	3	3	6	90	9	1	1	1	0	0	0	0	0	2	2	2	4	4	5	5	2	2	2	2	5	2	1	1	1
409	1	17	1	6	15	16	90	90	180	1	3	3	3	1	1	90	2	1	15	5	5	1	5	21	45	34	0	1	0	0	0	0	0	1	1	1	1	1	1	1	1	1	1	1	1	5	5	5	5
410	1	14	1	6	13	13	70	67	179	1	3	3	3	1	2	63.5	1	1	14	5	2	1	6	90	6	4	1	0	0	0	0	0	0	0.5	1	3	3	4	4	1	1	1	1	1	1	1	2	2	2
412	1	16	1	6	13	14	47	50	170	1	3	3	3	1	0	47	2	1	15	2	1	1	7	50	40	10	1	1	0	0	0	0	0	1	1	1	1	1	1	1	1	1	1	1	1	4	4	4	4
416	1	18	1	6	15	17	60	62	187	1	3	3	3	1	0	63	1	1	17	5	2	0	6	40	20	40	0	1	0	0	0	0	0	2	3	3	3	3	3	3	3	3	3	3	3	4	4	4	4
422	1	18	1	6	14	14	60	60	176	1	3	1	3	1	0	60	1	1	17	7	3	2	5	50	40	10	1	1	0	1	0	0	0	1	1	2	2	4	5	4	4	1	4	5	1	3	3	3	1
423	1	18	1	6	12	17	60	60	171	1	3	2	3	1	2	57	1	1	16	6	4	3	4	52	40	8	0	1	0	0	0	0	0	7	1	1	1	1	1	1	1	1	1	1	1	2	2	4	4
424	1	18	1	6	14	17	79	77	183	1	1	1	3	1	0	70	1	1	17	10	6	1	5	32	36	32	1	0	0	0	0	0	0	6	1	1	1	1	1	1	1	1	1	1	1	4	2	1	4
426	1	17	1	6	15	16	88	89	180	1	3	2	3	1	1	90	2	1	16	12	8	2	6	50	30	20	1	1	0	0	0	0	0	3	2	2	1	1	1	1	1	1	1	1	1	1	3	4	2
27	1	21	1	6	15	20	72	73	172	1	3	3	3	5	5	65	1	1	15	9	4	15	7	60	22	18	1	0	0	0	0	0	0	5	3	5	3	3	5	4	4	4	3	3	3	1	2	1	1
28	1	21	1	6	16	17	78	79	184	1	1	1	1	10	1	70	2	1	17	11	6	10	4	75	10	15	0	1	0	0	0	0	0	8	1	1	1	1	1	2	2	2	2	2	2	3	3	3	1
29	1	21	1	6	16	17	74	74	176	1	1	1	1	9	8	63	2	1	17	11	10	6	4	10	50	40	1	0	0	0	0	0	0	5	1	2	1	1	1	1	1	1	1	2	1	1	3	4	2
30	1	18	1	6	14	15	78	78	183	1	2	3	3	15	7	70	1	1	17	6	4	10	2	0	90	10	0	1	0	0	0	0	0	3	3	3	3	3	3	3	3	3	3	3	3	1	2	3	3
31	1	21	1	6	11	14	85	85	185	3	1	3	3	10	3	75	1	1	16	12	10	10	5	10	70	20	1	0	0	0	0	0	0	8	2	2	4	5	4	2	4	2	3	3	3	2	2	3	1
32	1	27	1	6	22	22	80	80	178	3	1	3	3	5	2	85	1	1	22	12	6	3	3	0	100	0	1	0	0	0	0	0	0	6	1	1	1	1	1	1	1	1	1	1	1	1	5	5	5
33	1	20	1	6	18	19	70	70	178	2	3	3	3	13	5	70	2	1	19	6	5	12	2	0	60	40	1	0	0	0	0	0	0	4	1	2	1	2	2	1	1	1	1	1	1	5	2	3	1
37	1	29	1	6	10	13	75	75	176	1	1	1	2	2	1	70	1	1	15	10	5	3	4	17	20	63	0	1	0	0	0	0	0	5	4	1	4	5	5	1	5	4	2	2	2	2	2	2	2
41	1	17	1	6	15	15	75	77	173	2	1	3	3	4	3	73	1	1	17	8	8	3	2	19	73	8	1	0	0	0	0	0	0	3	2	1	1	1	2	1	1	1	1	1	1	2	2	2	2
43	1	19	1	6	14	17	66	64	175	2	3	3	3	2	0	63	1	1	18	4	2	1	3	20	35	45	1	0	0	0	0	0	0	3	4	4	1	1	4	1	1	1	1	3	1	1	2	3	4
44	1	19	1	6	15	16	66	65	173	1	3	3	3	3	1	60	2	1	16	7	5	3	3	20	60	20	1	0	0	0	0	0	0	4	4	4	1	3	4	1	1	1	1	1	1	2	2	2	1
46	1	20	1	6	16	16	88	91	184	1	1	3	3	5	3	80	1	1	16	12	9	6	4	20	70	10	1	0	0	0	0	0	0	6	1	3	3	4	2	2	2	2	2	3	2	1	1	1	1
47	1	19	1	6	14	16	76	75	177	2	1	2	1	9	8	70	1	1	17	12	7	4	2	23	41	36	0	1	0	0	0	0	0	5	2	1	2	4	2	3	4	1	1	3	1	1	2	2	2
48	1	16	1	6	15	13	74	75	181	2	1	3	3	7	5	63	2	1	13	5.6	5.6	8	1	7	38	55	0	1	0	0	0	0	0	3.4	3	3	1	1	1	1	1	1	1	1	1	1	2	2	1
49	1	18	1	6	14	15	60	64	175	1	2	3	3	10	7	60	2	1	16	6	4	3	2	32	41	27	1	1	1	0	0	0	0	3	2	2	2	3	4	4	2	2	2	2	2	2	2	4	4
50	1	21	1	6	13	16	72	72	178	1	1	1	3	7	1	64	2	1	16	9	7	4	5	20	70	10	1	1	0	0	0	0	0	5	3	4	3	3	4	1	3	3	4	4	1	2	2	4	1
51	1	16	1	6	15	16	58	58	178	1	1	3	3	3	2	57	2	1	16	5	2	3	2	20	30	50	1	0	0	0	0	0	0	2	1	5	1	5	5	4	1	2	1	1	1	3	2	2	3
53	1	23	1	6	17	20	78	77	181	1	1	1	3	4	3	70	2	1	19	11	8	3	2	0	40	60	1	0	0	0	0	0	0	6	5	5	3	5	5	3	3	3	3	3	3	4	1	1	2
55	1	16	1	6	13	13	64	64	175	1	1	3	3	5	3	60	2	1	16	5	4	3	2	30	60	10	1	0	0	0	0	0	0	3	3	1	1	1	1	1	1	1	1	1	1	4	1	2	2
135	1	29	1	6	19	20	62	62	170	1	1	1	1	5	5	57	2	1	23	7	6	5	5	51	43	6	1	1	0	0	0	0	0	5	2	3	2	4	4	2	2	1	1	2	2	2	2	2	2
137	1	25	1	6	17	19	65	66	174	3	3	2	3	2	1	63	1	1	20	6	3	0	1	0	0	100	1	0	0	0	0	0	0	2	4	4	4	4	4	1	1	1	1	1	1	4	4	4	4
138	1	19	1	6	16	18	73	73	180	1	3	3	3	7	6	70	1	1	18	8	7	5	5	25	35	40	1	0	0	0	0	0	0	6	5	5	1	1	1	1	1	1	1	1	1	1	1	1	1
139	1	23	1	6	17	18	82	82	182	1	1	1	2	6	5	70	2	1	18	10	9	6	5	20	60	20	1	0	0	0	0	0	0	8	4	4	1	4	4	4	1	4	4	4	4	1	2	5	5
141	1	23	1	6	18	19	88	88	190	1	3	1	3	8	6	85	1	1	17	10	8	3	2	0	80	20	1	0	0	0	0	0	0	8	4	5	1	1	5	1	5	4	4	5	1	3	4	4	5
144	1	21	1	6	18	19	61	61	165	2	2	2	3	5	5	57	2	1	18	5	4	4	1	45	47	8	1	1	0	0	0	0	0	4	3	3	3	3	1	1	1	1	4	4	4	2	2	2	2
147	1	23	1	6	17	19	65	65	175	1	2	3	3	2	0	63	2	1	18	4	3	2	2	13	80	7	1	1	0	0	0	0	0	3	4	4	4	4	4	4	4	4	4	4	4	1	2	4	2
154	1	24	1	6	15	18	85	85	176	2	3	3	3	6	4	85	1	1	16	9	3	2	1	21	53	26	1	0	0	0	0	0	0	5	5	5	5	5	5	5	1	1	1	1	1	1	2	1	2
167	1	16	1	6	15	16	75	78	180	1	3	3	3	1	1	80	2	1	15	5	2	1	6	20	35	45	0	1	0	0	0	0	0	2	1	2	1	1	5	2	1	1	1	1	1	1	1	1	1
168	1	16	1	6	9	13	65	63	180	1	3	3	3	1	0	63	2	1	13	4	2	1	2	21	60	19	1	0	0	0	0	0	0	2	1	1	1	1	1	1	1	1	1	1	1	2	2	3	2
169	1	12	1	6	11	12	35	35	147	1	3	3	3	1	0	35	2	1	11	2	0	0	4	39	23	38	0	1	0	0	0	0	0	2	1	1	1	1	1	1	1	1	1	1	1	2	3	1	3
170	1	15	1	6	13	14	58	58	176	1	3	3	3	1	0	57	1	1	14	8	5	1	5	30	50	20	0	1	0	0	0	0	0	1	1	1	1	1	4	1	1	1	1	1	1	1	1	1	1
171	1	16	1	6	15	15	51	52	173	1	3	3	3	1	1	54	2	1	15	3	3	2	4	50	30	20	0	1	1	0	0	1	0	2	4	4	1	5	5	5	1	1	1	1	1	3	2	2	3
172	1	16	1	6	11	11	71	70	183	1	3	3	3	2	1	71	2	1	11	3	2	1	7	50	25	25	1	1	0	0	0	0	0	2	1	2	2	4	4	4	3	3	3	3	3	1	1	1	1
173	1	15	1	6	8	9	68	66	177	1	3	1	3	1	1	63	2	1	15	3	3	0	7	60	20	20	0	1	0	0	0	0	0	5	1	1	1	1	4	1	1	1	1	1	1	3	2	3	3
174	1	18	1	6	16	17	84	82	183	1	3	3	3	2	1	85	1	1	17	5	3	2	6	60	35	5	1	0	0	0	0	0	0	1	1	2	2	4	4	3	3	3	4	4	1	1	2	4	2
175	1	15	1	6	11	12	52	50	176	1	3	3	3	1	1	50	1	1	15	2	2	1	3	50	40	10	0	1	0	0	0	0	0	1	1	1	1	1	1	1	1	1	1	1	1	4	2	4	1
[truncated: 23 more columns]
