# Supplementary material for: Victory above all: the weight loss practices and perceptions of Chinese male kickboxers
Source: PeerJ. 2025 Jul 9;13:e19709. doi: 10.7717/peerj.19709 (PMC12255242; doi:10.7717/peerj.19709)
Supplement: Supplemental Information 3 [file peerj-13-19709-s003.xlsx]

## Sheet: Sheet1
ID	1. I have read the informed consent form above, and by completing this online survey, I agree to participate in this study.	2. Age	3. Gender	4. Your sport	5. At what age did you begin to practice your current sport?	6. At what age did you begin to compete your current sport?	7. How much do your current weight? ____kg	8. How much did you weigh in the last off-season?	9. How tall are you?	10. Please describe your achievements and participation in Boxing competitions to date. School, Regional or city level competition	State level	National level	International level	11. How many times did you compete in the last year (including non-official competitions)?	12. In how many competitions did you win medal in the last year (including non-official competitions)?	13. In which weight class do you compete?	14. Did you change your weight class in the last two years?	15. Have you ever lost weight in order to compete?
5	1	14	1	6	12	14	80	80	182	1	3	3	3	1	2	80	1	2
13	1	19	1	6	15	14	67	67	181	2	3	3	3	1	0	67	2	2
20	1	14	1	6	11	11	75	74	183	1	3	3	3	3	2	75	2	1
27	1	15	1	6	13	14	57	57	173	2	3	3	3	2	1	57	1	1
28	1	17	1	6	15	15	57	57	171	1	3	3	3	1	1	57	2	2
34	1	15	1	6	14	14	57	60	170	1	3	3	3	1	0	57	2	2
35	1	17	1	6	14	15	70	70	172	1	3	3	3	1	1	70	2	1
36	1	21	1	6	15	17	78	79	175	1	1	1	2	1	0	71	2	1
46	1	17	1	6	15	16	63	63	173	1	3	3	3	1	1	60	2	2
48	1	15	1	6	12	13	48	49	163	1	3	3	3	1	2	47	1	1
50	1	13	1	6	11	11	42	42	163	1	3	3	3	1	2	38	1	1
51	1	18	1	6	15	17	76	75	171	1	3	3	3	1	1	71	2	2
54	1	17	1	6	11	12	57	58	170	1	3	3	3	1	2	57	2	1
59	1	16	1	6	13	13	54	54	167	1	3	3	3	2	2	54	1	1
62	1	17	1	6	15	16	63	63	173	1	3	3	3	1	1	60	2	2
65	1	13	1	6	12	13	40	40	155	1	3	3	3	1	1	40	2	2
66	1	15	1	6	12	12	54	55	169	1	3	3	3	1	1	54	1	1
73	1	17	1	6	16	16	73	72	175	1	3	3	3	1	0	71	2	1
75	1	18	1	6	15	14	62	60	174	2	3	3	3	1	4	63	2	2
90	1	16	1	6	13	14	60	57	178	1	3	3	3	2	1	57	2	1
92	1	14	1	6	12	11	48	50	170	1	3	3	3	1	2	48	2	1
94	1	17	1	6	13	15	72	71	178	1	3	3	3	1	0	71	2	1
98	1	17	1	6	15	16	53	52	169	1	3	3	3	1	0	51	1	2
103	1	17	1	6	15	15	56	55	170	1	3	3	3	1	1	57	2	2
104	1	16	1	6	13	14	63	61	168	1	3	3	3	1	1	63	2	2
113	1	17	1	6	15	17	67	67	179	1	3	3	3	1	1	67	2	2
119	1	13	1	6	11	11	47	35	160	1	3	3	3	2	3	45	1	1
129	1	17	1	6	16	16	62	62	175	1	3	3	3	1	1	57	1	1
130	1	17	1	6	13	15	102	102	183	2	3	3	3	1	0	90+	1	2
134	1	14	1	6	13	13	42	41	156	1	3	3	3	1	2	37	1	2
135	1	15	1	6	10	12	52	53	169	2	3	3	3	1	0	52	1	1
136	1	15	1	6	10	13	62	62	170	1	3	3	3	1	0	57	1	1
145	1	17	1	6	15	17	65	62	173	1	3	3	3	1	0	62	2	1
146	1	18	1	6	16	17	71	69	181	1	3	3	3	1	1	71	1	1
151	1	19	1	6	16	18	62	62	173	1	3	3	3	1	1	60	2	2
153	1	17	1	6	16	17	63	63	168	1	3	3	3	1	3	63	2	2
157	1	16	1	6	13	13	67	69	178	1	3	3	3	2	2	71	2	2
159	1	17	1	6	16	16	75	85	173	1	3	3	3	1	1	75	2	2
162	1	15	1	6	12	14	58	56	173	1	3	3	3	1	1	57	2	1
163	1	14	1	6	9	13	60	60	170	2	3	3	3	1	0	57	1	2
170	1	19	1	6	14	15	56	56	171	1	3	3	3	1	1	57	2	2
172	1	16	1	6	14	15	67	71	178	1	3	3	3	2	2	71	1	2
175	1	19	1	6	15	18	66	66	183	1	3	2	3	1	2	63	2	2
180	1	16	1	6	12	13	65.4	65.4	177	1	3	3	3	2	2	63.5	2	1
185	1	18	1	6	14	17	71	69	177	1	3	3	3	1	1	66	2	1
191	1	19	1	6	15	15	65	65	172	1	3	3	3	1	1	67	2	2
194	1	15	1	6	14	15	57	57	173	2	3	3	3	2	1	54	1	1
198	1	15	1	6	11	13	51	51	173	1	3	3	3	1	1	45	2	2
208	1	14	1	6	11	13	45	42	162	1	3	3	3	2	2	42	1	1
210	1	17	1	6	14	15	56	55	173	1	3	3	3	4	4	60	1	2
212	1	16	1	6	14	15	65	64	181	1	3	3	3	8	8	63.5	2	1
215	1	19	1	6	15	18	67	67	180	1	3	1	3	1	1	63	2	1
226	1	16	1	6	12	14	57	57	171	1	3	3	3	1	0	54	2	2
228	1	14	1	6	13	13	45	45	162	1	3	3	3	1	1	42	2	2
233	1	16	1	6	14	15	62	60	170	1	3	3	3	1	1	57	1	2
234	1	15	1	6	13	13	64	64	172	1	3	3	3	1	1	60	2	2
235	1	13	1	6	10	13	76	76	156	1	3	3	3	1	2	26	2	1
245	1	19	1	6	12	19	72	72	180	1	3	3	3	1	1	67	2	1
249	1	18	1	6	16	17	67	63	170	1	3	3	3	1	1	60	2	1
253	1	16	1	6	14	14	63.5	63.6	173	1	3	3	3	1	1	63.5	2	1
254	1	16	1	6	12	14	58	58	180	1	3	3	3	2	2	60	2	1
255	1	16	1	6	10	10	90	84	173	1	3	3	3	1	1	85	2	1
259	1	18	1	6	15	15	60	62	172	1	3	3	3	1	1	60	2	2
262	1	16	1	6	13	13	52	52	170	1	3	3	3	2	2	52	1	1
268	1	17	1	6	12	16	63	65	180	1	3	3	3	1	1	60	1	2
274	1	14	1	6	11	13	43	41	158	1	3	3	3	1	0	38	2	2
276	1	16	1	6	14	14	71	74	179	1	3	3	3	1	1	71	2	1
279	1	16	1	6	13	14	53	54	172	1	3	3	3	2	1	54	2	2
280	1	17	1	6	16	16	74	72	183	1	3	3	3	1	1	71	2	1
285	1	16	1	6	11	14	69	67	175	1	3	3	3	1	2	67	2	1
290	1	17	1	6	14	16	78	78	176	1	3	3	3	1	1	75	1	1
296	1	15	1	6	14	15	51	52	173	1	3	3	3	1	3	54	2	2
297	1	15	1	6	12	14	59	59	169	1	3	1	3	2	2	57	1	1
305	1	17	1	6	15	15	75	75	183	1	3	3	3	1	1	75	2	1
309	1	17	1	6	15	16	106	106	187	2	3	3	3	1	0	90	2	2
315	1	12	1	6	12	12	48	47	170	1	3	3	3	1	0	48	2	1
317	1	14	1	6	12	12	56	54	175	1	3	3	3	1	0	54	1	1
319	1	16	1	6	15	15	69	67	178	1	3	3	3	1	2	67	1	1
327	1	13	1	6	10	13	40	39	150	1	3	3	3	1	1	38	2	1
331	1	14	1	6	12	14	51	52	163	1	3	3	3	1	3	51.5	2	1
334	1	18	1	6	17	17	63	62	178	1	3	3	3	1	0	63	1	2
340	1	18	1	6	14	17	63	60	173	1	3	3	3	1	0	65	2	1
346	1	16	1	6	15	15	80	80	185	1	3	3	3	3	1	80	2	1
350	1	15	1	6	12	13	50	49	157	1	3	3	3	1	1	48	2	2
353	1	14	1	6	12	13	39	35	155	1	3	1	3	3	3	38	1	2
356	1	22	1	6	16	19	70	70	172	1	3	1	2	1	0	60	2	1
360	1	17	1	6	14	15	75	77	190	1	3	3	3	1	0	75	2	1
362	1	14	1	6	12	13	55	52	168	1	3	3	3	1	2	51	2	1
377	1	18	1	6	13	15	76	76	186	1	3	1	3	1	0	74	2	1
379	1	16	1	6	13	15	65	64	173	1	3	3	3	1	2	57	2	1
380	1	17	1	6	16	16	90	90	193	2	3	3	3	3	1	85	2	1
381	1	17	1	6	12	16	63	65	170	1	3	3	3	1	0	63	2	1
382	1	15	1	6	12	13	67	68	174	2	3	3	3	1	2	63.5	1	1
383	1	17	1	6	14	16	67	66	175	1	3	3	3	3	1	63.5	2	1
388	1	14	1	6	13	13	61	58	176	1	3	3	3	1	0	57	1	1
389	1	19	1	6	12	18	70	70	178	1	3	2	3	1	0	63	2	1
392	1	17	1	6	12	13	68	65	172	1	3	3	3	1	0	67	2	1
394	1	18	1	6	12	15	80	83	175	1	3	3	3	1	0	80	2	1
397	1	16	1	6	10	14	70	63	174	1	3	3	3	1	1	67	1	2
399	1	18	1	6	16	16	73	72	183	1	3	3	3	1	0	71	1	2
403	1	18	1	6	16	16	60	61	175	1	3	3	3	1	0	60	1	2
406	1	18	1	6	14	14	61	57	180	1	3	1	3	4	4	54	1	1
407	1	19	1	6	15	15	63	60	172	1	3	3	3	1	0	60	2	2
409	1	17	1	6	15	16	90	90	180	1	3	3	3	1	1	90	2	1
410	1	14	1	6	13	13	70	67	179	1	3	3	3	1	2	63.5	1	1
412	1	16	1	6	13	14	47	50	170	1	3	3	3	1	0	47	2	1
414	1	18	1	6	18	18	75	75	187	1	3	3	3	1	0	75	2	2
416	1	18	1	6	15	17	60	62	187	1	3	3	3	1	0	63	1	1
418	1	17	1	6	17	17	71	73	187	1	3	3	3	1	1	71	2	2
422	1	18	1	6	14	14	60	60	176	1	3	1	3	1	0	60	1	1
423	1	18	1	6	12	17	60	60	171	1	3	2	3	1	2	57	1	1
424	1	18	1	6	14	17	79	77	183	1	1	1	3	1	0	70	1	1
426	1	17	1	6	15	16	88	89	180	1	3	2	3	1	1	90	2	1
598	1	17	1	6	14	14	66	66	178	1	3	3	3	1	1	66	2	2
27	1	21	1	6	15	20	72	73	172	1	3	3	3	5	5	65	1	1
28	1	21	1	6	16	17	78	79	184	1	1	1	1	10	1	70	2	1
29	1	21	1	6	16	17	74	74	176	1	1	1	1	9	8	63	2	1
30	1	18	1	6	14	15	78	78	183	1	2	3	3	15	7	70	1	1
31	1	21	1	6	11	14	85	85	185	3	1	3	3	10	3	75	1	1
32	1	27	1	6	22	22	80	80	178	3	1	3	3	5	2	85	1	1
33	1	20	1	6	18	19	70	70	178	2	3	3	3	13	5	70	2	1
37	1	29	1	6	10	13	75	75	176	1	1	1	2	2	1	70	1	1
38	1	17	1	6	16	17	65	67	183	2	3	3	3	1	1	60	2	2
41	1	17	1	6	15	15	75	77	173	2	1	3	3	4	3	73	1	1
43	1	19	1	6	14	17	66	64	175	2	3	3	3	2	0	63	1	1
44	1	19	1	6	15	16	66	65	173	1	3	3	3	3	1	60	2	1
46	1	20	1	6	16	16	88	91	184	1	1	3	3	5	3	80	1	1
47	1	19	1	6	14	16	76	75	177	2	1	2	1	9	8	70	1	1
48	1	16	1	6	15	13	74	75	181	2	1	3	3	7	5	63	2	1
49	1	18	1	6	14	15	60	64	175	1	2	3	3	10	7	60	2	1
50	1	21	1	6	13	16	72	72	178	1	1	1	3	7	1	64	2	1
51	1	16	1	6	15	16	58	58	178	1	1	3	3	3	2	57	2	1
53	1	23	1	6	17	20	78	77	181	1	1	1	3	4	3	70	2	1
55	1	16	1	6	13	13	64	64	175	1	1	3	3	5	3	60	2	1
133	1	15	1	6	14	15	59	59	175	2	3	3	3	1	0	59	1	2
135	1	29	1	6	19	20	62	62	170	1	1	1	1	5	5	57	2	1
137	1	25	1	6	17	19	65	66	174	3	3	2	3	2	1	63	1	1
138	1	19	1	6	16	18	73	73	180	1	3	3	3	7	6	70	1	1
139	1	23	1	6	17	18	82	82	182	1	1	1	2	6	5	70	2	1
141	1	23	1	6	18	19	88	88	190	1	3	1	3	8	6	85	1	1
144	1	21	1	6	18	19	61	61	165	2	2	2	3	5	5	57	2	1
147	1	23	1	6	17	19	65	65	175	1	2	3	3	2	0	63	2	1
154	1	24	1	6	15	18	85	85	176	2	3	3	3	6	4	85	1	1
167	1	16	1	6	15	16	75	78	180	1	3	3	3	1	1	80	2	1
168	1	16	1	6	9	13	65	63	180	1	3	3	3	1	0	63	2	1
169	1	12	1	6	11	12	35	35	147	1	3	3	3	1	0	35	2	1
170	1	15	1	6	13	14	58	58	176	1	3	3	3	1	0	57	1	1
171	1	16	1	6	15	15	51	52	173	1	3	3	3	1	1	54	2	1
172	1	16	1	6	11	11	71	70	183	1	3	3	3	2	1	71	2	1
173	1	15	1	6	8	9	68	66	177	1	3	1	3	1	1	63	2	1
174	1	18	1	6	16	17	84	82	183	1	3	3	3	2	1	85	1	1
175	1	15	1	6	11	12	52	50	176	1	3	3	3	1	1	50	1	1
